# Supplementary material
Source: PubMed Central journal article supplement (PMC2927075)

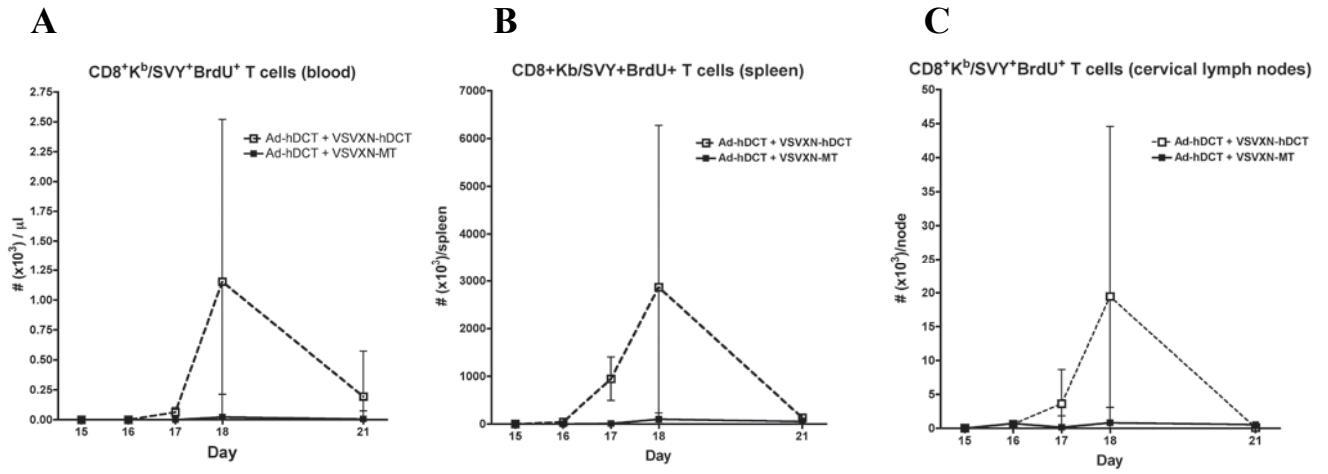

Figure S1 Bridle *et al.*

Supplement: mt201098x1.pdf [file mt201098x1.pdf]

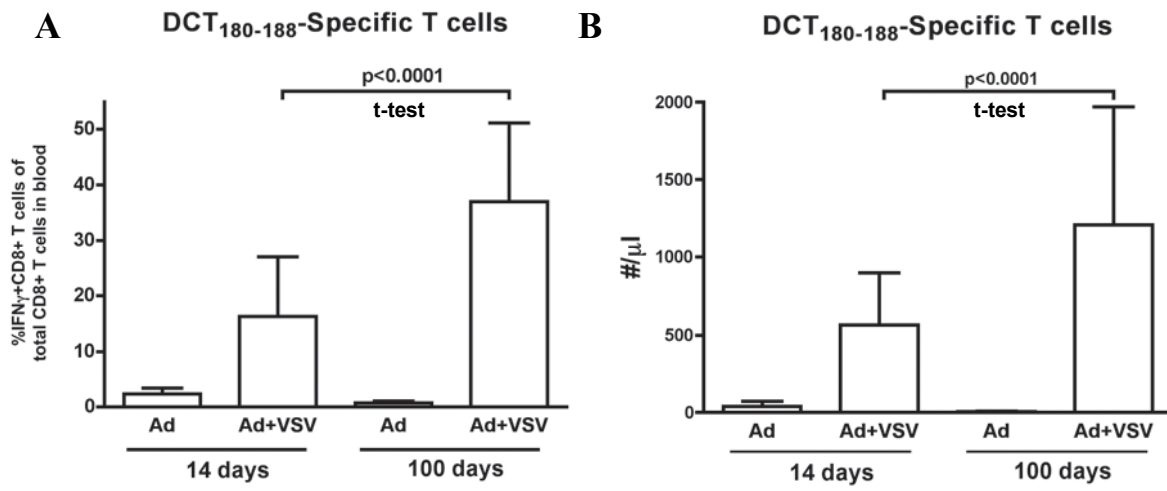

**Figure S2** Bridle *et al.*

Supplement: mt201098x2.pdf [file mt201098x2.pdf]
